# Supplementary material for: Human mediastinal adipose tissue displays certain characteristics of brown fat
Source: PubMed Central journal article supplement — Nutr Diabetes. 2013 May 13;3(5):e66–. doi: 10.1038/nutd.2013.6 (PMC3671748; doi:10.1038/nutd.2013.6), 2013-05-13

## **Supporting Information**

### **Figure 1**

Expression levels of seven selected genes in subcutaneous and mediastinal adipose tissue from microarray analysis

### **Table 1**

Top 20 GO gene sets enriched in mediastinal as compared to subcutaneous adipose tissue identified by gene set enrichment analysis

### **Figure 2**

Volcano plots of the top 20 enriched gene sets in mediastinal as compared to subcutaneous adipose tissue

**Figure 1**

Expression levels of seven selected genes in subcutaneous and mediastinal adipose tissue from exon array analysis

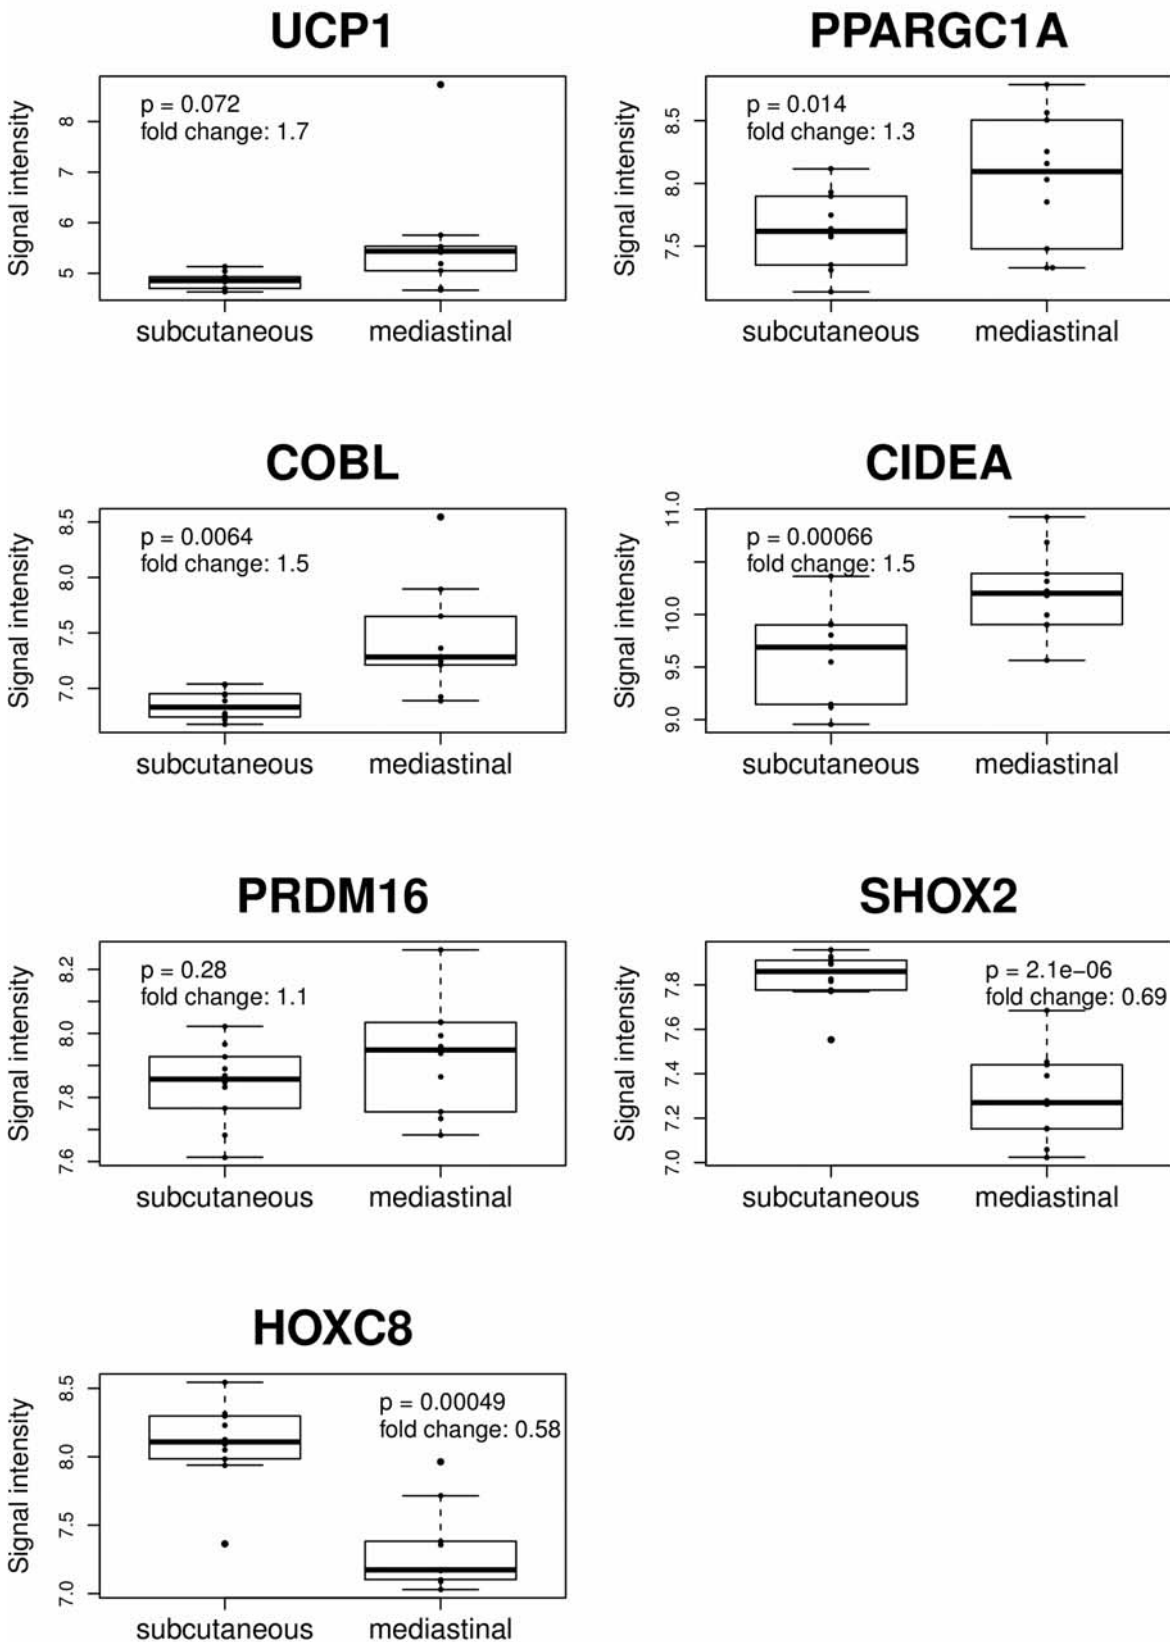

**Table 1**

Top 20 GO gene sets enriched in mediastinal as compared to subcutaneous adipose tissue identified by gene set enrichment analysis

| <b>Gene sets enriched in mediastinal adipose tissue</b>     | <b>p</b> | <b>q</b> |
|-------------------------------------------------------------|----------|----------|
| GO:0003723 RNA binding                                      | 3.68E-06 | 0.0022   |
| GO:0005759 mitochondrial matrix                             | 4.32E-06 | 0.0022   |
| GO:0005743 mitochondrial inner membrane                     | 3.29E-05 | 0.0110   |
| GO:0016568 chromatin modification                           | 0.0002   | 0.0437   |
| GO:0003735 structural constituent of ribosome               | 0.0004   | 0.0714   |
| GO:0006414 translational elongation                         | 0.0006   | 0.0969   |
| GO:0045449 regulation of transcription                      | 0.0009   | 0.1254   |
| GO:0008168 methyltransferase activity                       | 0.0010   | 0.1301   |
| GO:0005747 mitochondrial respiratory chain complex I        | 0.0017   | 0.1661   |
| GO:0006412 translation                                      | 0.0017   | 0.1661   |
| GO:0005840 ribosome                                         | 0.0019   | 0.1753   |
| GO:0006635 fatty acid beta-oxidation                        | 0.0024   | 0.1826   |
| GO:0042645 mitochondrial nucleoid                           | 0.0024   | 0.1826   |
| GO:0008380 RNA splicing                                     | 0.0026   | 0.1826   |
| GO:0005730 nucleolus                                        | 0.0027   | 0.1826   |
| GO:0005681 spliceosome                                      | 0.0030   | 0.1909   |
| GO:0030529 ribonucleoprotein complex                        | 0.0039   | 0.2285   |
| GO:0007166 cell surface receptor linked signal transduction | 0.0051   | 0.2721   |
| GO:0008137 NADH dehydrogenase (ubiquinone) activity         | 0.0052   | 0.2721   |
| GO:0051539 4 iron, 4 sulfur cluster binding                 | 0.0054   | 0.2722   |

Adjusted p-values (q-values) were calculated using the Benjamini and Hochberg step-up false discovery rate-controlling procedure [1].

## Reference

1. Benjamini Y, Hochberg Y (1995) Controlling the False Discovery Rate: A Practical and Powerful Approach to Multiple Testing. *Journal of the Royal Statistical Society Series B (Methodological)* 57: 289–300. doi:10.2307/2346101.

### Volcano plots of the top 20 enriched gene sets in mediastinal as compared to subcutaneous adipose tissue

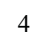

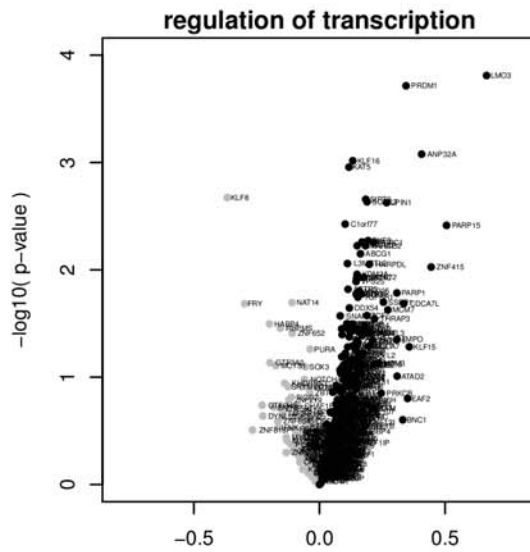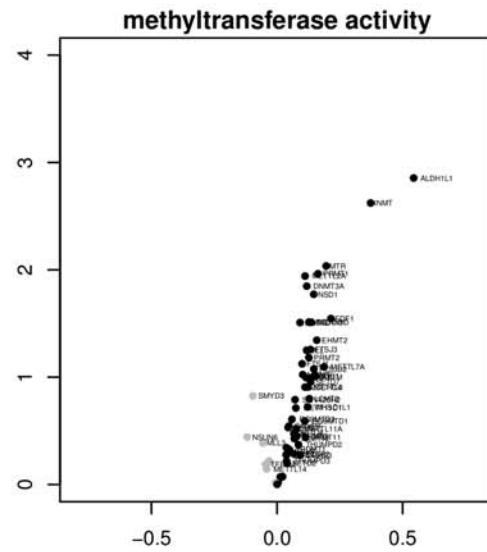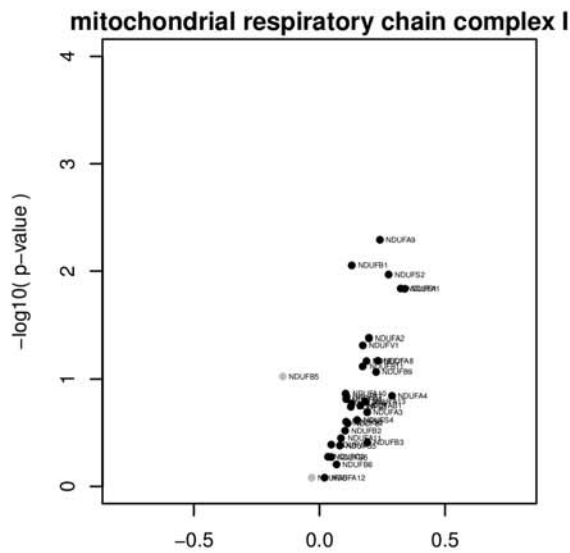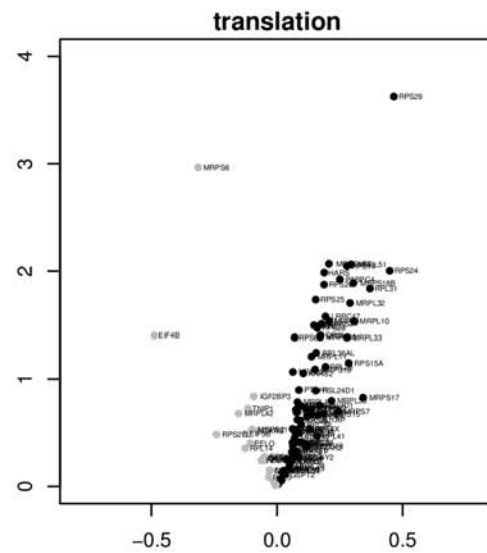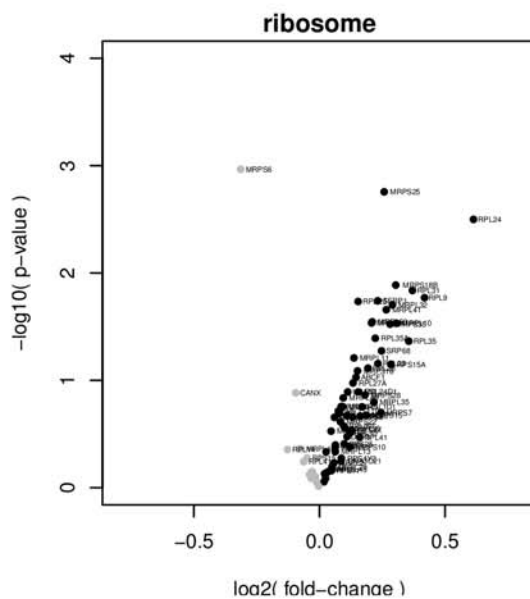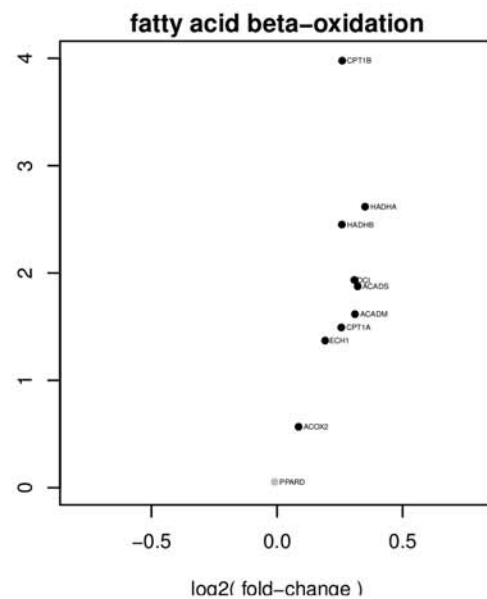

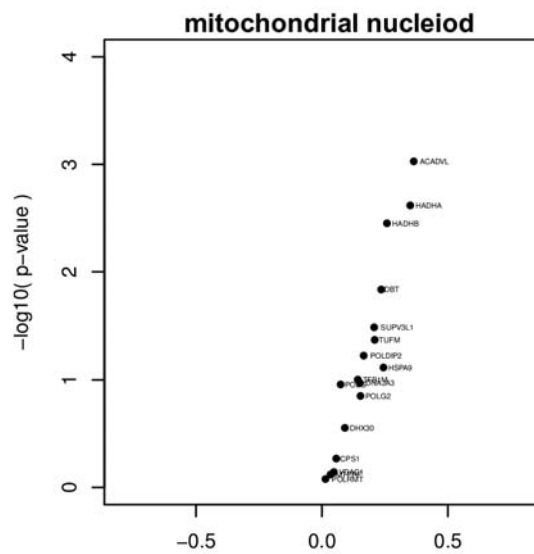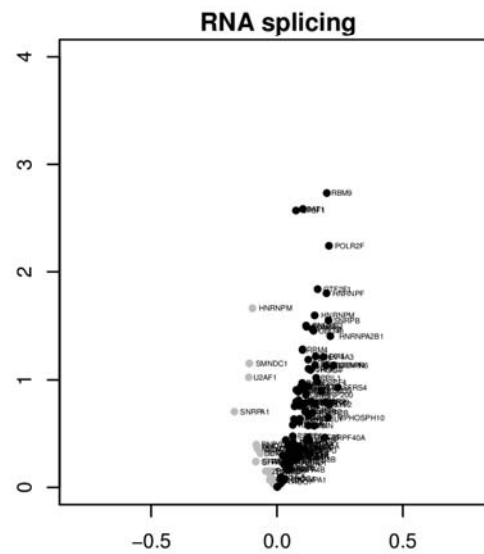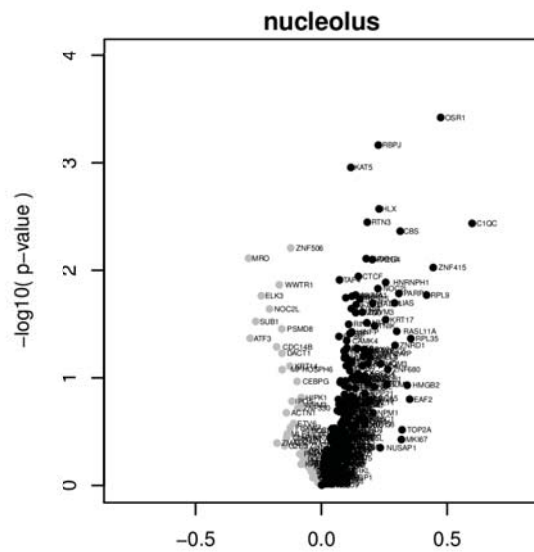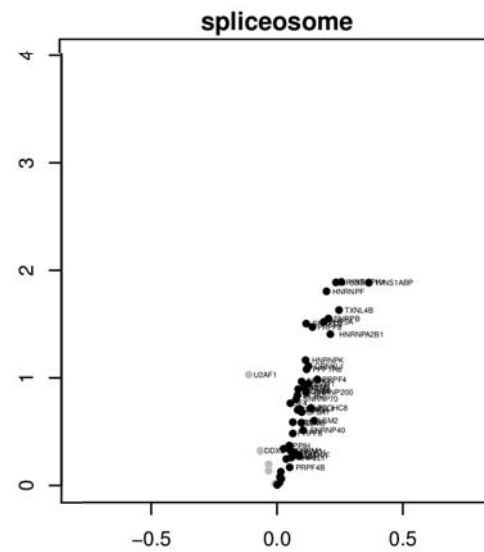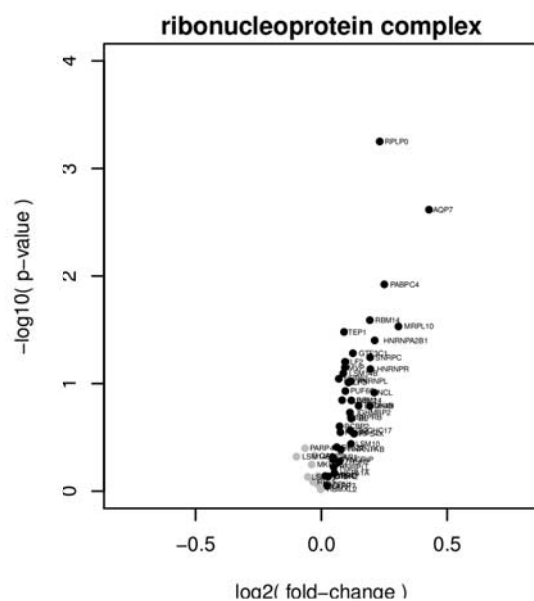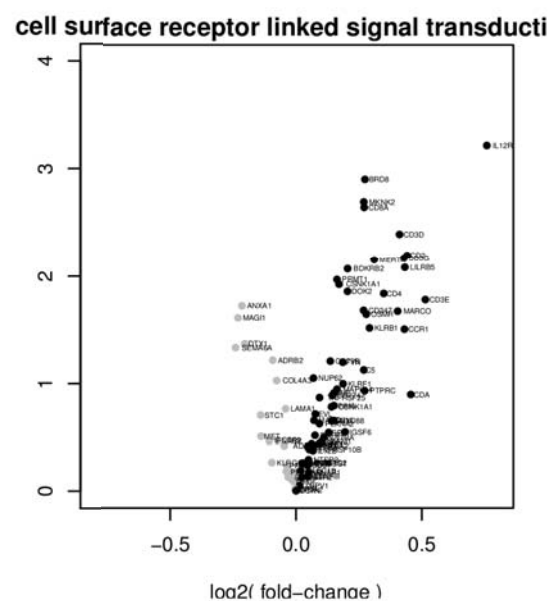

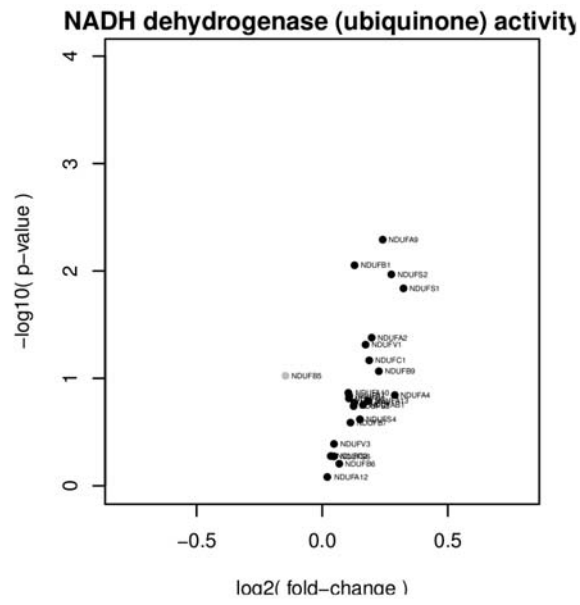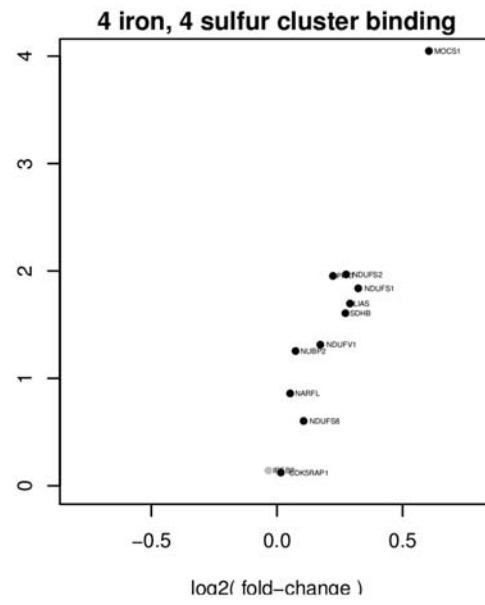

Supplement: nutd20136x1.pdf [file nutd20136x1.pdf]
